# Supplementary material for: Large decrease in paediatric hospitalisations during the COVID-19 outbreak in Japan
Source: PubMed Central journal article supplement — BMJ Paediatr Open. 2021 Mar 11;5(1):e001013. doi: 10.1136/bmjpo-2020-001013 (PMC7956728; doi:10.1136/bmjpo-2020-001013), 2021-03-11
Supplement: bmjpo-2020-001013.draft_revisions.pdf [file bmjpo-2020-001013.draft_revisions.pdf]

# BMJ Paediatrics Open

BMJ Paediatrics Open is committed to open peer review. As part of this commitment we make the peer review history of every article we publish publicly available.

When an article is published we post the peer reviewers' comments and the authors' responses online. We also post the versions of the paper that were used during peer review. These are the versions that the peer review comments apply to.

The versions of the paper that follow are the versions that were submitted during the peer review process. They are not the versions of record or the final published versions. They should not be cited or distributed as the published version of this manuscript.

BMJ Paediatrics Open is an open access journal and the full, final, typeset and author-corrected version of record of the manuscript is available on our site with no access controls, subscription charges or pay-per-view fees (<http://bmjpaedsopen.bmj.com>).

If you have any questions on BMJ Paediatrics Open's open peer review process please email [info.bmjpo@bmj.com](mailto:info.bmjpo@bmj.com)

# BMJ Paediatrics Open

## Paediatric Hospitalisations During the COVID-19 Outbreak in Japan

|                               |                                                                                                                                                                                                                                                                                                                                                                                                                                                                     |
|-------------------------------|---------------------------------------------------------------------------------------------------------------------------------------------------------------------------------------------------------------------------------------------------------------------------------------------------------------------------------------------------------------------------------------------------------------------------------------------------------------------|
| Journal:                      | <i>BMJ Paediatrics Open</i>                                                                                                                                                                                                                                                                                                                                                                                                                                         |
| Manuscript ID                 | bmjpo-2020-001013                                                                                                                                                                                                                                                                                                                                                                                                                                                   |
| Article Type:                 | Original research letter                                                                                                                                                                                                                                                                                                                                                                                                                                            |
| Date Submitted by the Author: | 30-Dec-2020                                                                                                                                                                                                                                                                                                                                                                                                                                                         |
| Complete List of Authors:     | Sano, Kazuaki; The University of Tokyo, Department of Public Health, Graduate School of Medicine<br>Nakamura, Masaki; Medical Data Vision Co., Ltd.<br>Ninomiya, Hideki; Keio University, Department of Health Policy and Management; Dataack, Inc.<br>Kobayashi, Yasuki; The University of Tokyo, Department of Public Health, Graduate School of Medicine<br>Miyawaki, Atsushi; The University of Tokyo, Department of Public Health, Graduate School of Medicine |
| Keywords:                     | COVID-19, Health services research                                                                                                                                                                                                                                                                                                                                                                                                                                  |
|                               |                                                                                                                                                                                                                                                                                                                                                                                                                                                                     |

SCHOLARONE™  
Manuscripts

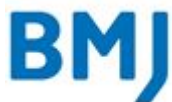

I, the Submitting Author has the right to grant and does grant on behalf of all authors of the Work (as defined in the below author licence), an exclusive licence and/or a non-exclusive licence for contributions from authors who are: i) UK Crown employees; ii) where BMJ has agreed a CC-BY licence shall apply, and/or iii) in accordance with the terms applicable for US Federal Government officers or employees acting as part of their official duties; on a worldwide, perpetual, irrevocable, royalty-free basis to BMJ Publishing Group Ltd ("BMJ") its licensees and where the relevant Journal is co-owned by BMJ to the co-owners of the Journal, to publish the Work in this journal and any other BMJ products and to exploit all rights, as set out in our [licence](#).

The Submitting Author accepts and understands that any supply made under these terms is made by BMJ to the Submitting Author unless you are acting as an employee on behalf of your employer or a postgraduate student of an affiliated institution which is paying any applicable article publishing charge ("APC") for Open Access articles. Where the Submitting Author wishes to make the Work available on an Open Access basis (and intends to pay the relevant APC), the terms of reuse of such Open Access shall be governed by a Creative Commons licence – details of these licences and which [Creative Commons](#) licence will apply to this Work are set out in our licence referred to above.

Other than as permitted in any relevant BMJ Author's Self Archiving Policies, I confirm this Work has not been accepted for publication elsewhere, is not being considered for publication elsewhere and does not duplicate material already published. I confirm all authors consent to publication of this Work and authorise the granting of this licence.

## Paediatric Hospitalisations During the COVID-19 Outbreak in Japan

Kazuaki Sano, MD<sup>1</sup>

Masaki Nakamura, BE<sup>2</sup>

Hideki Ninomiya, MD<sup>3,4</sup>

Yasuki Kobayashi, MD, PhD<sup>1</sup>

Atsushi Miyawaki, MD, PhD<sup>1</sup>

<sup>1</sup> Department of Public Health, Graduate School of Medicine, the University of Tokyo,  
Tokyo, Japan

<sup>2</sup> Medical Data Vision Co., Ltd., Tokyo, Japan

<sup>3</sup> Department of Health Policy and Management, Keio University, Tokyo, Japan

<sup>4</sup> Dataack, Inc., Tokyo, Japan

### Corresponding author:

Atsushi Miyawaki, MD, PhD

Assistant Professor

Department of Public Health

1  
2  
3  
4  
5  
6 Graduate School of Medicine, the University of Tokyo  
7

8  
9 Address: 7-3-1 Hongo, Bunkyo-ku, Tokyo, Japan 1130033  
10

11  
12 Phone: +81-3-5841-3494  
13

14  
15 Fax: +81-3-5841-3494  
16

17  
18 Email: [amiyawaki-ky@umin.ac.jp](mailto:amiyawaki-ky@umin.ac.jp)  
19  
20  
21  
22  
23

24 Word count: 594 words  
25

26  
27 The number of references: 3  
28

29  
30 The number of tables/figures: 2  
31  
32  
33  
34  
35

36 Key words: COVID-19, pediatric care, non-pharmaceutical intervention, Japan  
37  
38  
39  
40  
41  
42  
43  
44  
45  
46  
47  
48  
49  
50  
51  
52  
53  
54  
55  
56  
57  
58  
59  
60

**ABSTRACT**

Little is known about the trends in paediatric hospitalisations during the pandemic.

Using a large-scale inpatient database from acute-care hospitals in Japan, we analyzed the number of hospitalisations of children aged 1–17 years for weeks 9–21 of 2020 (during the outbreak) vs. 2017-2019 with adjustment for the yearly and weekly trends.

Hospitalisation decreased in most major conditions, including communicable diseases and trauma; in contrast, there was no significant reduction in hospitalisations for appendicitis. Further studies are expected to investigate the positive and negative aspects of these reduced hospitalisations.

1  
2  
3  
4  
5  
6 The COVID-19 pandemic has significantly affected children's environments  
7  
8  
9 worldwide. Studies have reported substantial decreases in paediatric emergency  
10  
11 department visits and subsequent hospitalisations[1,2]. However, little is known about  
12  
13 the overall trends in emergency and non-emergency hospitalisations during the  
14  
15 pandemic. We investigated the nationwide changes in the number of paediatric  
16  
17 hospitalisations for major medical and surgical conditions during the COVID-19  
18  
19 outbreak in Japan.  
20  
21  
22  
23  
24  
25  
26  
27  
28  
29

30 We used the Diagnosis Procedure Combination inpatient database, built by Medical  
31  
32 Data Vision Co, Ltd (Tokyo, Japan)[3]. The database includes de-identified  
33  
34 demographic/clinical information collected from Japanese acute-care hospitals for  
35  
36 per-diem reimbursement. We aggregated the number of hospitalisations of children  
37  
38 aged 1–17 years per week across 272 continuously observed hospitals during the  
39  
40 calendar weeks 1–21 of 2020 (January 1, 2020, to May 26, 2020) and the same periods  
41  
42 in 2017–2019. We included only patients admitted for  $\leq 30$  days (accounting for 99% of  
43  
44 the paediatric hospitalisations in our dataset) because our dataset could not observe  
45  
46 patients who were hospitalised for more than 30 days from week 21 of 2020.  
47  
48  
49  
50  
51  
52  
53  
54  
55  
56  
57  
58  
59  
60

1  
2  
3  
4  
5  
6 We described weekly trends in (A) total paediatric hospitalisations and those with a  
7  
8  
9 primary diagnosis of one of nine selected conditions, based on the date of admission.  
10

11  
12 We used the six most common medical conditions (determined based on *International*  
13  
14  
15 *Classification of Diseases 10* code by our internal investigation using the 2017–2020  
16  
17  
18 dataset), including (B) food allergy, (C) acute lower respiratory infections (ALRI)  
19  
20  
21 except COVID-19, (D) Kawasaki disease (KD), (E) intestinal infectious diseases (IID),  
22  
23  
24 (F) febrile convulsions, (G) asthma, and three surgical conditions, including (H)  
25  
26  
27 appendicitis, (I) inguinal hernia and (J) trauma. We also examined hospitalisations with  
28  
29  
30 a primary diagnosis of COVID-19 among (K) children and (L) all ages to illustrate the  
31  
32  
33 status of the COVID-19 epidemic in Japan.  
34  
35  
36  
37  
38

39 We employed a “difference-in-differences” model using Poisson regression to estimate  
40  
41  
42 the changes in the number of hospitalisations during the COVID-19 outbreak. It  
43  
44  
45 included a variable for each week, the year indicator (2017–2020), and an interaction  
46  
47  
48 variable between the outbreak status (week 9–21; the government requested nationwide  
49  
50  
51 cancellation of large-scale events and school closures in week 9 of 2020) and the  
52  
53  
54 indicator for the year 2020.  
55  
56  
57  
58  
59  
60



1  
2  
3  
4  
5  
6 The average number of paediatric hospitalisations per week during weeks 9–21  
7  
8  
9 decreased from 2,132 in 2017–2019 to 1,314 in 2020, a reduction of 38.4% (adjusted  
10  
11  
12 incidence rate ratios [aIRR], 0.60; 95% confidence interval [CI], 0.53–0.69;  $p < 0.001$ )  
13  
14  
15 (**Figure 1** and **Table 1**). The average number of hospitalisations per week during weeks  
16  
17  
18 9–21 decreased in 2020 compared with 2017–2019 for food allergy (aIRR, 0.61), for  
19  
20  
21 ALRI (aIRR, 0.39), for KD (aIRR, 0.77), for IID (aIRR, 0.22), for febrile convulsions  
22  
23  
24 (aIRR, 0.69), for asthma (aIRR, 0.37), for inguinal hernia (aIRR, 0.80), and for trauma  
25  
26  
27 (aIRR, 0.68). We found no evidence that the number of hospitalisations for appendicitis  
28  
29  
30 decreased.  
31  
32  
33  
34  
35

36 There were significant decreases in paediatric hospitalisations across Japanese  
37  
38  
39 acute-care hospitals during the COVID-19 outbreak, especially concerning conditions  
40  
41  
42 related to communicable diseases and trauma, but not for appendicitis. These declines  
43  
44  
45 may partly suggest a reduced burden of paediatric disease, possibly due to  
46  
47  
48 non-pharmaceutical interventions. However, it is unclear to what extent the  
49  
50  
51 postponed/avoided hospital care explained these reduced hospitalisations, and further  
52  
53  
54 studies are expected to investigate the positive and negative aspects of the pandemic on  
55  
56  
57 children's health.  
58  
59  
60

1  
2  
3  
4  
5  
6  
7  
8  
9  
10  
11  
12  
13  
14  
15  
16  
17  
18  
19  
20  
21  
22  
23  
24  
25  
26  
27  
28  
29  
30  
31  
32  
33  
34  
35  
36  
37  
38  
39  
40  
41  
42  
43  
44  
45  
46  
47  
48  
49  
50  
51  
52  
53  
54  
55  
56  
57  
58  
59  
60

Limitations of this study include the patient population, which did not cover all the medical facilities in Japan. Nevertheless, our dataset covered as many as 272 acute-care hospitals, and the underlying patterns may be similar across the country. Second, the detailed mechanisms through which the paediatric hospitalisations decreased remain unknown.

**References**

- 1 Lazzerini M, Barbi E, Apicella A, *et al*. Delayed access or provision of care in Italy resulting from fear of COVID-19. *Lancet Child Adolesc Heal* 2020;4:e10–1. doi:10.1016/S2352-4642(20)30108-5
- 2 Pines JM, Zocchi MS, Black BS, *et al*. Characterizing pediatric emergency department visits during the COVID-19 pandemic. *Am J Emerg Med* Published Online First: 23 November 2020. doi:10.1016/j.ajem.2020.11.037
- 3 Abe K, Miyawaki A, Nakamura M, *et al*. Trends in hospitalizations for asthma during the COVID-19 outbreak in Japan. *J Allergy Clin Immunol Pract* Published Online First: 14 October 2020. doi:10.1016/j.jaip.2020.09.060

1  
2  
3  
4  
5  
6 **Author contributions:** KS and AM had full access to the data in the study and takes  
7  
8  
9 responsibility for the accuracy and integrity of the data and its analyses.  
10

11  
12 Study concept and design: all authors.  
13

14  
15 Acquisition, analysis or interpretation of data: All authors.  
16

17  
18 Drafting of the manuscript: KS and AM.  
19

20  
21 Critical revision of the manuscript for important intellectual content: All authors.  
22

23  
24 Statistical analyses: KS and AM.  
25

26  
27 Administrative, technical or material support: all authors.  
28

29  
30 Study supervision: AM.  
31  
32  
33  
34  
35

36 **Funding:** This study was funded by JSPS KAKENHI Grants (grant number 20K18956  
37  
38 to AM). Medical Data Vision (Tokyo, Japan) provided the dataset used in this study in  
39  
40 the form of labor service. AM was supported by the Social Science Research Council  
41  
42  
43  
44  
45 Abe Fellowship.  
46  
47  
48  
49  
50

51 **Competing interests:** MN is one of the board of directors in Medical Data Vision and  
52  
53  
54 received a personal salary from it outside of this study. HN supported Medical Data  
55  
56  
57 Vision in algorithm construction and received personal fee outside this study.  
58  
59  
60

1  
2  
3  
4  
5  
6  
7  
8  
9 **Ethics approval:** Ethics Board of the University of Tokyo approved this study

10  
11  
12 (approval no: 2020105NI).  
13  
14  
15  
16  
17

18 **Patient and public involvement**

19  
20  
21 Patients and/or the public were not involved in the design, or conduct, or reporting, or  
22  
23  
24 dissemination plans of this research.  
25  
26  
27  
28  
29

30 **Data availability statement:** Data are available on reasonable request. Due to the  
31  
32  
33 contractual restrictions between the authors and the Medical Data Vision, the data are  
34  
35  
36 available on request.  
37  
38  
39  
40  
41  
42  
43  
44  
45  
46  
47  
48  
49  
50  
51  
52  
53  
54  
55  
56  
57  
58  
59  
60

1  
2  
3  
4  
5  
6  
7 **Figure 1. Trends in the number of hospitalisations of children across 272**  
8  
9 **acute-care hospitals in Japan, overall and by condition during weeks 1–21 in 2017–**  
10  
11 **2020.**

12  
13  
14  
15  
16  
17  
18 Abbreviations: ALRI, acute lower respiratory infections; KD, Kawasaki disease; IID,  
19  
20  
21  
22  
23  
24  
25  
26  
27  
28  
29  
30  
31  
32  
33  
34  
35  
36  
37  
38  
39  
40  
41  
42  
43  
44  
45  
46  
47  
48  
49  
50  
51  
52  
53  
54  
55  
56  
57  
58  
59  
60  
intestinal infectious diseases. We illustrated weekly paediatric hospitalisations, overall,  
and for each common condition across the 272 acute-care hospitals in Japan (A–J). We  
also showed trends in hospitalisations for COVID-19 among children (K) and all ages  
(L), using *International Classification of Diseases 10* code U071 and B342. B342 was  
used for reimbursement for COVID-19 hospitalisations before April 2020.

**Table 1. Change in the number of paediatric hospitalisations during the COVID-19 outbreak in Japan**

| Condition‡          | No. of hospitalisations per week* |                    | Difference between 2017-2019 vs. 2020 |          | Adjusted incidence rate ratio† |            |         |
|---------------------|-----------------------------------|--------------------|---------------------------------------|----------|--------------------------------|------------|---------|
|                     | Weeks 9-21 of 2017-2019           | Weeks 9-21 of 2020 | Count                                 | % change | Estimate                       | 95% CI     | P value |
| Total               | 2132                              | 1314               | -818                                  | -38.4    | 0.60                           | 0.53, 0.69 | <0.001  |
| Food allergy        | 119                               | 103                | -16                                   | -13.1    | 0.61                           | 0.52, 0.70 | <0.001  |
| ALRI                | 379                               | 145                | -235                                  | -61.9    | 0.39                           | 0.26, 0.58 | <0.001  |
| KD                  | 58                                | 42                 | -16                                   | -27.4    | 0.77                           | 0.67, 0.89 | <0.001  |
| IID                 | 209                               | 49                 | -160                                  | -76.5    | 0.22                           | 0.17, 0.29 | <0.001  |
| Febrile convulsions | 42                                | 28                 | -14                                   | -33.2    | 0.69                           | 0.57, 0.84 | <0.001  |
| Asthma              | 120                               | 36                 | -84                                   | -69.7    | 0.37                           | 0.29, 0.47 | <0.001  |
| Appendicitis        | 49                                | 45                 | -4                                    | -8.9     | 0.96                           | 0.82, 1.12 | 0.59    |
| Inguinal hernia     | 34                                | 30                 | -4                                    | -12.2    | 0.80                           | 0.67, 0.95 | 0.01    |
| Trauma              | 199                               | 136                | -63                                   | -31.9    | 0.68                           | 0.61, 0.75 | <0.001  |

CI: confidence interval.

\* The numbers of hospitalisations were shown as a weekly average over the corresponding weeks.

† A Poisson regression was applied to estimate adjusted incidence rate ratio with the weekly and the yearly trends adjusted. Huber-White standard errors were used for inference.  $P < 0.05$  was interpreted as statistically significant (Stata 16.1).

‡ *International Classification of Diseases 10* codes for the conditions were: T780 and T781 (food allergy); A37, B012, B052, B59, B371, J9–J18 and J20–J22 (ALRI, acute lower respiratory infections); M303 (KD, Kawasaki disease); A00–A09 (IID, intestinal infectious diseases); R560 (febrile convulsions); J45 and J46 (asthma); K35–K37 (appendicitis); K40 (inguinal hernia); S00–S99 and T00–T14 (trauma).

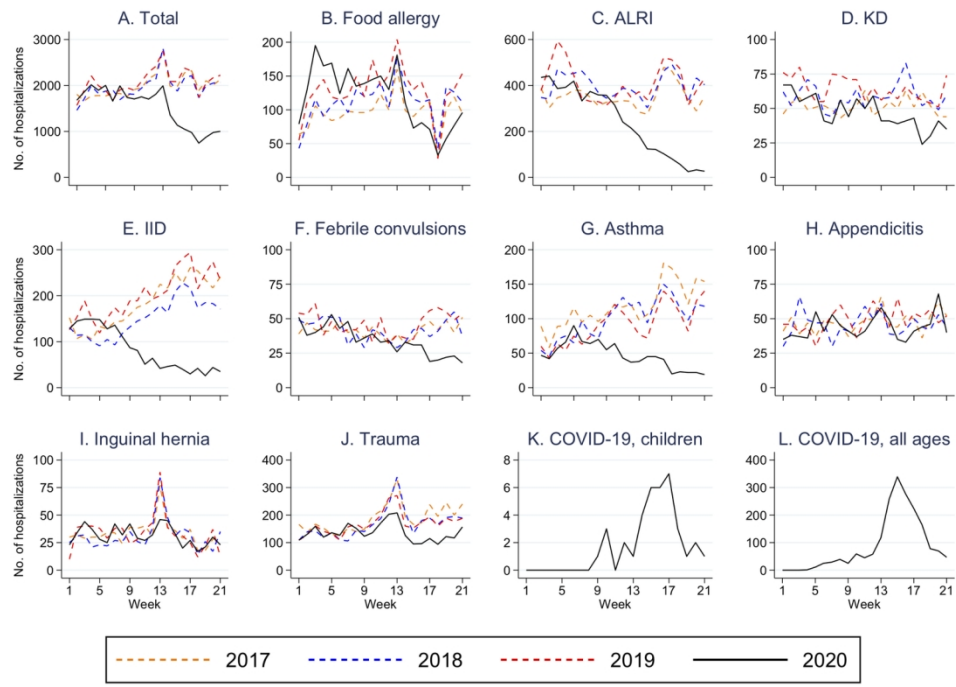

139x101mm (300 x 300 DPI)



# BMJ Paediatrics Open

## Large Decrease in Paediatric Hospitalisations During the COVID-19 Outbreak in Japan

|                               |                                                                                                                                                                                                                                                                                                                                                                                                                                                                     |
|-------------------------------|---------------------------------------------------------------------------------------------------------------------------------------------------------------------------------------------------------------------------------------------------------------------------------------------------------------------------------------------------------------------------------------------------------------------------------------------------------------------|
| Journal:                      | <i>BMJ Paediatrics Open</i>                                                                                                                                                                                                                                                                                                                                                                                                                                         |
| Manuscript ID                 | bmjpo-2020-001013.R1                                                                                                                                                                                                                                                                                                                                                                                                                                                |
| Article Type:                 | Original research letter                                                                                                                                                                                                                                                                                                                                                                                                                                            |
| Date Submitted by the Author: | 14-Feb-2021                                                                                                                                                                                                                                                                                                                                                                                                                                                         |
| Complete List of Authors:     | Sano, Kazuaki; The University of Tokyo, Department of Public Health, Graduate School of Medicine<br>Nakamura, Masaki; Medical Data Vision Co., Ltd.<br>Ninomiya, Hideki; Keio University, Department of Health Policy and Management; Dataack, Inc.<br>Kobayashi, Yasuki; The University of Tokyo, Department of Public Health, Graduate School of Medicine<br>Miyawaki, Atsushi; The University of Tokyo, Department of Public Health, Graduate School of Medicine |
| Keywords:                     | COVID-19, Health services research, Epidemiology                                                                                                                                                                                                                                                                                                                                                                                                                    |
|                               |                                                                                                                                                                                                                                                                                                                                                                                                                                                                     |

SCHOLARONE™  
Manuscripts



I, the Submitting Author has the right to grant and does grant on behalf of all authors of the Work (as defined in the below author licence), an exclusive licence and/or a non-exclusive licence for contributions from authors who are: i) UK Crown employees; ii) where BMJ has agreed a CC-BY licence shall apply, and/or iii) in accordance with the terms applicable for US Federal Government officers or employees acting as part of their official duties; on a worldwide, perpetual, irrevocable, royalty-free basis to BMJ Publishing Group Ltd ("BMJ") its licensees and where the relevant Journal is co-owned by BMJ to the co-owners of the Journal, to publish the Work in this journal and any other BMJ products and to exploit all rights, as set out in our [licence](#).

The Submitting Author accepts and understands that any supply made under these terms is made by BMJ to the Submitting Author unless you are acting as an employee on behalf of your employer or a postgraduate student of an affiliated institution which is paying any applicable article publishing charge ("APC") for Open Access articles. Where the Submitting Author wishes to make the Work available on an Open Access basis (and intends to pay the relevant APC), the terms of reuse of such Open Access shall be governed by a Creative Commons licence – details of these licences and which [Creative Commons](#) licence will apply to this Work are set out in our licence referred to above.

Other than as permitted in any relevant BMJ Author's Self Archiving Policies, I confirm this Work has not been accepted for publication elsewhere, is not being considered for publication elsewhere and does not duplicate material already published. I confirm all authors consent to publication of this Work and authorise the granting of this licence.

# Large Decrease in Paediatric Hospitalisations During the COVID-19 Outbreak in

## Japan

Kazuaki Sano, MD<sup>1</sup>

Masaki Nakamura, BE<sup>2</sup>

Hideki Ninomiya, MD<sup>3,4</sup>

Yasuki Kobayashi, MD, PhD<sup>1</sup>

Atsushi Miyawaki, MD, PhD<sup>1</sup>

<sup>1</sup> Department of Public Health, Graduate School of Medicine, the University of Tokyo,  
Tokyo, Japan

<sup>2</sup> Medical Data Vision Co., Ltd., Tokyo, Japan

<sup>3</sup> Department of Health Policy and Management, Keio University, Tokyo, Japan

<sup>4</sup> Dataack, Inc., Tokyo, Japan

### Corresponding author:

Atsushi Miyawaki, MD, PhD

Assistant Professor

1  
2  
3  
4  
5  
6 Department of Public Health  
7

8  
9 Graduate School of Medicine, the University of Tokyo  
10

11  
12 Address: 7-3-1 Hongo, Bunkyo-ku, Tokyo, Japan 1130033  
13

14  
15 Phone: +81-3-5841-3494  
16

17  
18 Fax: +81-3-5841-3494  
19

20  
21 Email: [amiyawaki-tyk@umin.ac.jp](mailto:amiyawaki-tyk@umin.ac.jp)  
22  
23  
24  
25  
26

27 Word count: 598 words  
28

29  
30 The number of references: 5  
31

32  
33 The number of tables/figures: 2  
34  
35  
36  
37  
38

39 Key words: COVID-19; Health services research; Epidemiology  
40  
41  
42  
43  
44  
45  
46  
47  
48  
49  
50  
51  
52  
53  
54  
55  
56  
57  
58  
59  
60

**ABSTRACT**

We evaluated the nationwide overall trends in paediatric hospitalisations including non-emergency hospitalisations during the COVID-19 pandemic. Using inpatient data from 272 acute-care hospitals covering 12.4% of all admissions in Japan, we analyzed the number of hospitalisations of children aged 1–17 years for weeks 9–21 of 2020 (during the outbreak) vs. 2017-2019. Hospitalisation decreased during the COVID-19 outbreak by 38.4% (adjusted incidence rate ratio, 0.60; 95% confidence interval, 0.53-0.69). There were reductions in communicable diseases and trauma, possibly through non-pharmaceutical interventions, but not in appendicitis. This study highlights the importance of reallocating paediatric care resources under the pandemic.

1  
2  
3  
4  
5  
6 The COVID-19 pandemic has significantly affected children's social environments and  
7  
8  
9 access to healthcare services worldwide. Studies have reported substantial decreases in  
10  
11  
12 paediatric emergency department visits and subsequent hospitalisations[1-3]. However,  
13  
14  
15 little is known about the nationwide overall trends including non-emergency  
16  
17  
18 hospitalisations during the pandemic. We investigated the nationwide changes in the  
19  
20  
21 number of paediatric hospitalisations for major conditions during the COVID-19  
22  
23  
24 outbreak in Japan.  
25  
26  
27  
28  
29

30 We used a de-identified inpatient claims database, collected under Diagnosis Procedure  
31  
32  
33 Combination/Per-Diem Payment System, built by Medical Data Vision Co, Ltd (Tokyo,  
34  
35  
36 Japan)[4]. Briefly, this payment system is part of public health insurance reimbursement  
37  
38  
39 system in Japan[5], and therefore, the database consists of demographic/clinical  
40  
41  
42 information of all the hospitalisations for each hospital. The database included 272  
43  
44  
45 Japanese acute-care hospitals that consented to data utilisation (covering 12.4% of all  
46  
47  
48 admissions into acute-care hospitals in Japan in January 2019). We aggregated the  
49  
50  
51 weekly number of hospitalisations of children aged 1–17 years during the calendar  
52  
53  
54 weeks 1–21 of 2020 (January 1 to May 26) and the same periods in 2017–2019. We  
55  
56  
57 included only patients admitted for  $\leq 30$  days (accounting for 99% of the paediatric  
58  
59  
60

1  
2  
3  
4  
5  
6 hospitalisations in our dataset) because our dataset could not observe patients who were  
7  
8  
9 hospitalised for more than 30 days from week 21 of 2020.  
10

11  
12  
13  
14  
15 We described weekly trends in total paediatric hospitalisations and those with a primary  
16  
17  
18 diagnosis of one of nine selected conditions, based on the date of admission. We used  
19  
20  
21 nine common conditions (determined based on *International Classification of Diseases*  
22  
23  
24 *10* code), including food allergy, acute lower respiratory infections (ALRI) except  
25  
26  
27 COVID-19, Kawasaki disease (KD), intestinal infectious diseases (IID), febrile  
28  
29  
30 convulsions, asthma, appendicitis, inguinal hernia and trauma. We also examined  
31  
32  
33 hospitalisations with a primary diagnosis of COVID-19 to illustrate the epidemic in  
34  
35  
36 Japan.  
37

38  
39  
40  
41  
42 We employed a “difference-in-differences” model using Poisson regression to estimate  
43  
44  
45 the changes in the number of hospitalisations during the COVID-19 outbreak. It  
46  
47  
48 included a variable for each week, the year indicator (2017–2020), and an interaction  
49  
50  
51 variable between the outbreak status (week 9–21; the government requested nationwide  
52  
53  
54 cancellation of large-scale events and school closures in week 9 of 2020) and the year  
55  
56  
57 indicator for 2020.  
58  
59  
60

1  
2  
3  
4  
5  
6  
7  
8  
9 The weekly mean number of paediatric hospitalisations during weeks 9–21 decreased  
10 from 2,132 in 2017–2019 to 1,314 in 2020, a reduction of 38.4% (adjusted incidence  
11 rate ratios, 0.60; 95% confidence interval, 0.53–0.69) (**Figure 1** and **Table 1**). The  
12 weekly mean number of hospitalisations during weeks 9–21 decreased in 2020  
13 compared with 2017–2019 for food allergy (0.61; 0.52-0.70), for ALRI (0.39;  
14 0.26-0.58), for KD (0.77; 0.67-0.89), for IID (0.22; 0.17-0.29), for febrile convulsions  
15 (0.69; 0.57-0.84), for asthma (0.37; 0.29-0.47), for inguinal hernia (0.80; 0.67-0.95),  
16 and for trauma (0.68, 0.61-0.75). We found no evidence that the number of  
17 hospitalisations for appendicitis decreased (0.96; 0.82-1.12).  
18  
19  
20  
21  
22  
23  
24  
25  
26  
27  
28  
29  
30  
31  
32  
33  
34  
35  
36  
37  
38  
39

40 There were considerable decreases in paediatric hospitalisations across Japanese  
41 acute-care hospitals during the COVID-19 outbreak, especially concerning conditions  
42 related to communicable diseases and trauma, but not for appendicitis. Our findings  
43 may encourage policymakers to reallocate paediatric care resources under the pandemic.  
44  
45  
46  
47  
48  
49  
50

51 There are several possible explanations for these reductions. First, non-pharmaceutical  
52 interventions (physical distancing and individual hygiene measures) probably reduced  
53 infections. School closures and stay-at-home requests presumably decreased accidents.  
54  
55  
56  
57  
58  
59  
60



1  
2  
3  
4  
5  
6  
7 Second, deferred/cancelled treatments or examinations may explain the modest decrease  
8  
9 in inguinal hernia hospitalisations, especially in week 13 (corresponding to the spring  
10  
11 break) of 2020 compared with previous years.  
12  
13  
14  
15  
16  
17

18 Limitations of this study include the patient population, which did not cover all the  
19  
20 Japanese hospitals although our dataset covered 272 acute-care hospitals. Second, the  
21  
22 detailed mechanisms through which the paediatric hospitalisations decreased remain  
23  
24  
25  
26  
27 unknown.  
28  
29  
30  
31  
32  
33  
34  
35  
36  
37  
38  
39  
40  
41  
42  
43  
44  
45  
46  
47  
48  
49  
50  
51  
52  
53  
54  
55  
56  
57  
58  
59  
60

## References

- 1 Lazzerini M, Barbi E, Apicella A, *et al.* Delayed access or provision of care in Italy resulting from fear of COVID-19. *Lancet Child Adolesc Heal* 2020;**4**:e10–1. doi:10.1016/S2352-4642(20)30108-5
- 2 Pines JM, Zocchi MS, Black BS, *et al.* Characterizing pediatric emergency department visits during the COVID-19 pandemic. *Am J Emerg Med* Published Online First: 23 November 2020. doi:10.1016/j.ajem.2020.11.037
- 3 Williams TC, MacRae C, Swann O V, *et al.* Indirect effects of the COVID-19 pandemic on paediatric healthcare use and severe disease: a retrospective national cohort study. *Arch Dis Child* Published Online First: 15 January 2021. doi:10.1136/archdischild-2020-321008
- 4 Abe K, Miyawaki A, Nakamura M, *et al.* Trends in hospitalizations for asthma during the COVID-19 outbreak in Japan. *J Allergy Clin Immunol Pract* Published Online First: 14 October 2020. doi:10.1016/j.jaip.2020.09.060
- 5 Hayashida K, Murakami G, Matsuda S, *et al.* History and Profile of Diagnosis Procedure Combination (DPC): Development of a Real Data Collection System for Acute Inpatient Care in Japan. *J Epidemiol* 2021;**31**:1–11. doi:10.2188/jea.je20200288

1  
2  
3  
4  
5  
6 **Author contributions:** KS and AM had full access to the data in the study and takes  
7  
8  
9 responsibility for the accuracy and integrity of the data and its analyses.  
10

11  
12 Study concept and design: all authors.  
13

14  
15 Acquisition, analysis or interpretation of data: All authors.  
16

17  
18 Drafting of the manuscript: KS and AM.  
19

20  
21 Critical revision of the manuscript for important intellectual content: All authors.  
22

23  
24 Statistical analyses: KS and AM.  
25

26  
27 Administrative, technical or material support: all authors.  
28

29  
30 Study supervision: AM.  
31  
32  
33  
34  
35

36 **Funding:** This study was funded by JSPS KAKENHI Grants (grant number 20K18956  
37  
38 to AM). Medical Data Vision (Tokyo, Japan) provided the dataset used in this study in  
39  
40 the form of labor service. AM was supported by the Social Science Research Council  
41  
42  
43 Abe Fellowship.  
44  
45  
46  
47  
48  
49  
50

51 **Competing interests:** MN is one of the board of directors in Medical Data Vision and  
52  
53 received a personal salary from it outside of this study. HN supported Medical Data  
54  
55  
56  
57 Vision in algorithm construction and received personal fee outside this study.  
58  
59  
60

1  
2  
3  
4  
5  
6  
7  
8  
9 **Ethics approval:** Ethics Board of the University of Tokyo approved this study

10  
11  
12 (approval no: 2020105NI).  
13  
14  
15  
16  
17

18 **Patient and public involvement**

19  
20  
21 Patients and/or the public were not involved in the design, or conduct, or reporting, or  
22  
23  
24 dissemination plans of this research.  
25  
26  
27  
28  
29

30 **Data availability statement:** Data are available on reasonable request. Due to the  
31  
32  
33 contractual restrictions between the authors and the Medical Data Vision, the data are  
34  
35  
36 available on request.  
37  
38  
39  
40  
41  
42  
43  
44  
45  
46  
47  
48  
49  
50  
51  
52  
53  
54  
55  
56  
57  
58  
59  
60

1  
2  
3  
4  
5  
6  
7 **Figure 1. Trends in the number of hospitalisations of children across 272**  
8  
9 **acute-care hospitals in Japan, overall and by condition during weeks 1–21 in 2017–**  
10  
11 **2020.**

12  
13  
14  
15  
16  
17  
18 Abbreviations: ALRI, acute lower respiratory infections; KD, Kawasaki disease; IID,  
19  
20  
21  
22  
23  
24  
25  
26  
27  
28  
29  
30  
31  
32  
33  
34  
35  
36  
37  
38  
39  
40  
41  
42  
43  
44  
45  
46  
47  
48  
49  
50  
51  
52  
53  
54  
55  
56  
57  
58  
59  
60  
intestinal infectious diseases. We illustrated weekly paediatric hospitalisations, overall,  
and for each common condition across the 272 acute-care hospitals in Japan (A–J). We  
also showed trends in hospitalisations for COVID-19 among children (K) and all ages  
(L), using *International Classification of Diseases 10* code U071 and B342. B342 was  
used for reimbursement for COVID-19 hospitalisations before April 2020.

**Table 1. Change in the number of paediatric hospitalisations during the COVID-19 outbreak in Japan**

| Condition‡                    | No. of hospitalisations per week*  |                    | Difference between 2017-2019 vs. 2020 |          | Adjusted incidence rate ratio† |            |            |
|-------------------------------|------------------------------------|--------------------|---------------------------------------|----------|--------------------------------|------------|------------|
|                               | Weeks 9-21 of 2017-2019            | Weeks 9-21 of 2020 | Count                                 | % change | Estimate                       | 95% CI     | P value    |
|                               | Acute lower respiratory infections | 379                | 145                                   | -235     | -61.9                          | 0.39       | 0.26, 0.58 |
| Intestinal infectious disease | 209                                | 49                 | -160                                  | -76.5    | 0.22                           | 0.17, 0.29 | <0.001     |
| Trauma                        | 199                                | 136                | -63                                   | -31.9    | 0.68                           | 0.61, 0.75 | <0.001     |
| Asthma                        | 120                                | 36                 | -84                                   | -69.7    | 0.37                           | 0.29, 0.47 | <0.001     |
| Food allergy                  | 119                                | 103                | -16                                   | -13.1    | 0.61                           | 0.52, 0.70 | <0.001     |
| Kawasaki disease              | 58                                 | 42                 | -16                                   | -27.4    | 0.77                           | 0.67, 0.89 | <0.001     |
| Appendicitis                  | 49                                 | 45                 | -4                                    | -8.9     | 0.96                           | 0.82, 1.12 | 0.59       |
| Febrile convulsions           | 42                                 | 28                 | -14                                   | -33.2    | 0.69                           | 0.57, 0.84 | <0.001     |
| Inguinal hernia               | 34                                 | 30                 | -4                                    | -12.2    | 0.80                           | 0.67, 0.95 | 0.01       |
| Total                         | 2132                               | 1314               | -818                                  | -38.4    | 0.60                           | 0.53, 0.69 | <0.001     |

CI: confidence interval.

\* The numbers of hospitalisations were shown as a weekly mean over the corresponding weeks.

† A Poisson regression was applied to estimate adjusted incidence rate ratio with the weekly and the yearly trends adjusted. Huber-White standard errors were used for inference. P<0.05 was interpreted as statistically significant (Stata 16.1).

‡ *International Classification of Diseases 10* codes for the conditions were: A37, B012, B052, B59, B371, J9–J18 and J20–J22 (acute lower respiratory infections); A00-A09 (intestinal infectious diseases); S00-S99 and T00-T14 (trauma); J45 and J46 (asthma); T780 and T781 (food allergy); M303 (Kawasaki disease); K35-K37 (appendicitis); R560 (febrile convulsions); K40 (inguinal hernia).

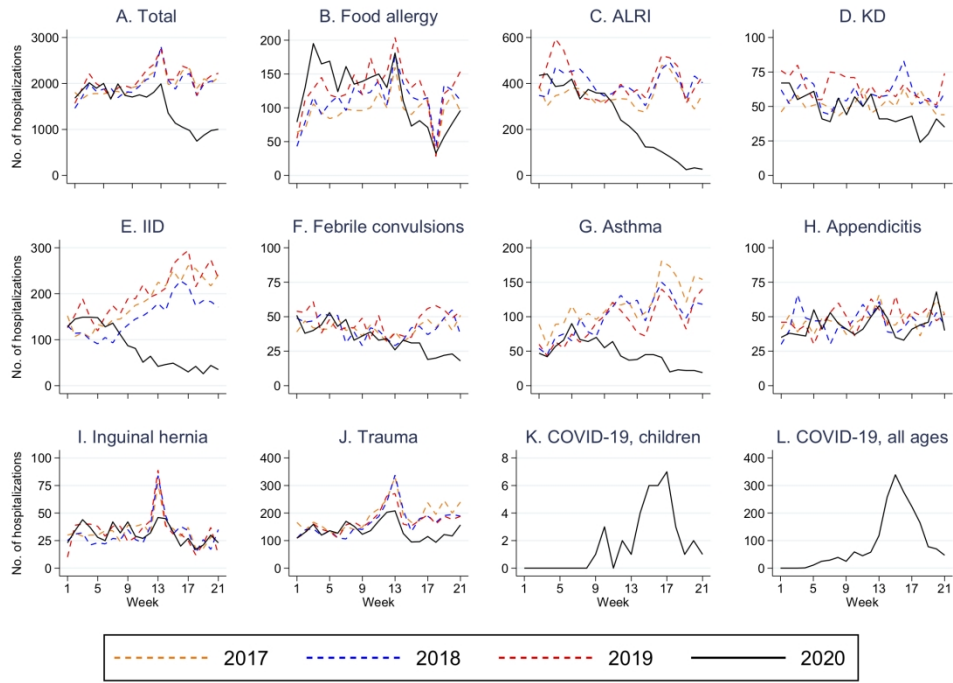

139x101mm (400 x 400 DPI)

# BMJ Paediatrics Open

## Large Decrease in Paediatric Hospitalisations During the COVID-19 Outbreak in Japan

|                               |                                                                                                                                                                                                                                                                                                                                                                                                                                                                     |
|-------------------------------|---------------------------------------------------------------------------------------------------------------------------------------------------------------------------------------------------------------------------------------------------------------------------------------------------------------------------------------------------------------------------------------------------------------------------------------------------------------------|
| Journal:                      | <i>BMJ Paediatrics Open</i>                                                                                                                                                                                                                                                                                                                                                                                                                                         |
| Manuscript ID                 | bmjpo-2020-001013.R2                                                                                                                                                                                                                                                                                                                                                                                                                                                |
| Article Type:                 | Original research letter                                                                                                                                                                                                                                                                                                                                                                                                                                            |
| Date Submitted by the Author: | 23-Feb-2021                                                                                                                                                                                                                                                                                                                                                                                                                                                         |
| Complete List of Authors:     | Sano, Kazuaki; The University of Tokyo, Department of Public Health, Graduate School of Medicine<br>Nakamura, Masaki; Medical Data Vision Co., Ltd.<br>Ninomiya, Hideki; Keio University, Department of Health Policy and Management; Dataack, Inc.<br>Kobayashi, Yasuki; The University of Tokyo, Department of Public Health, Graduate School of Medicine<br>Miyawaki, Atsushi; The University of Tokyo, Department of Public Health, Graduate School of Medicine |
| Keywords:                     | COVID-19, Health services research, Epidemiology                                                                                                                                                                                                                                                                                                                                                                                                                    |
|                               |                                                                                                                                                                                                                                                                                                                                                                                                                                                                     |

SCHOLARONE™  
Manuscripts



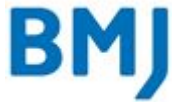

I, the Submitting Author has the right to grant and does grant on behalf of all authors of the Work (as defined in the below author licence), an exclusive licence and/or a non-exclusive licence for contributions from authors who are: i) UK Crown employees; ii) where BMJ has agreed a CC-BY licence shall apply, and/or iii) in accordance with the terms applicable for US Federal Government officers or employees acting as part of their official duties; on a worldwide, perpetual, irrevocable, royalty-free basis to BMJ Publishing Group Ltd ("BMJ") its licensees and where the relevant Journal is co-owned by BMJ to the co-owners of the Journal, to publish the Work in this journal and any other BMJ products and to exploit all rights, as set out in our [licence](#).

The Submitting Author accepts and understands that any supply made under these terms is made by BMJ to the Submitting Author unless you are acting as an employee on behalf of your employer or a postgraduate student of an affiliated institution which is paying any applicable article publishing charge ("APC") for Open Access articles. Where the Submitting Author wishes to make the Work available on an Open Access basis (and intends to pay the relevant APC), the terms of reuse of such Open Access shall be governed by a Creative Commons licence – details of these licences and which [Creative Commons](#) licence will apply to this Work are set out in our licence referred to above.

Other than as permitted in any relevant BMJ Author's Self Archiving Policies, I confirm this Work has not been accepted for publication elsewhere, is not being considered for publication elsewhere and does not duplicate material already published. I confirm all authors consent to publication of this Work and authorise the granting of this licence.

# Large Decrease in Paediatric Hospitalisations During the COVID-19 Outbreak in

## Japan

Kazuaki Sano, MD<sup>1</sup>

Masaki Nakamura, BE<sup>2</sup>

Hideki Ninomiya, MD<sup>3,4</sup>

Yasuki Kobayashi, MD, PhD<sup>1</sup>

Atsushi Miyawaki, MD, PhD<sup>1</sup>

<sup>1</sup> Department of Public Health, Graduate School of Medicine, the University of Tokyo,  
Tokyo, Japan

<sup>2</sup> Medical Data Vision Co., Ltd., Tokyo, Japan

<sup>3</sup> Department of Health Policy and Management, Keio University, Tokyo, Japan

<sup>4</sup> Dataack, Inc., Tokyo, Japan

### Corresponding author:

Atsushi Miyawaki, MD, PhD

Assistant Professor

1  
2  
3  
4  
5  
6 Department of Public Health  
7

8  
9 Graduate School of Medicine, the University of Tokyo  
10

11  
12 Address: 7-3-1 Hongo, Bunkyo-ku, Tokyo, Japan 1130033  
13

14  
15 Phone: +81-3-5841-3494  
16

17  
18 Fax: +81-3-5841-3494  
19

20  
21 Email: [amiyawaki-ky@umin.ac.jp](mailto:amiyawaki-ky@umin.ac.jp)  
22  
23  
24  
25  
26  
27

28 Word count: 598 words  
29

30 The number of references: 5  
31

32  
33 The number of tables/figures: 2  
34  
35  
36  
37  
38

39 Key words: COVID-19; Health services research; Epidemiology  
40  
41  
42  
43  
44  
45  
46  
47  
48  
49  
50  
51  
52  
53  
54  
55  
56  
57  
58  
59  
60

**ABSTRACT**

We evaluated the nationwide trends in paediatric hospitalisations including non-emergency hospitalisations during the COVID-19 pandemic in Japan. Using inpatient data from 272 acute-care hospitals covering 12.4% of total hospitalisations of all ages, we analyzed the number of hospitalisations of children (ages 1–17) for weeks 9–21 of 2020 (during the outbreak) vs. 2017-2019. Hospitalisation decreased during the outbreak by 38.4% (adjusted incidence rate ratio, 0.60; 95% confidence interval, 0.53-0.69). There were reductions in communicable diseases and trauma, possibly through non-pharmaceutical interventions, but not in appendicitis. This study highlights the potential importance of reallocating paediatric care resources during the pandemic.

1  
2  
3  
4  
5  
6 The COVID-19 pandemic has significantly affected children's social environments and  
7  
8  
9 access to healthcare services worldwide. Studies have reported substantial decreases in  
10  
11  
12 paediatric emergency department visits and subsequent hospitalisations[1-3]. However,  
13  
14  
15 little is known about the nationwide overall trends including non-emergency  
16  
17  
18 hospitalisations during the pandemic. We investigated the nationwide changes in the  
19  
20  
21 number of paediatric hospitalisations for major conditions during the COVID-19  
22  
23  
24 outbreak in Japan.  
25  
26  
27  
28  
29

30 We used a de-identified inpatient claims database, collected under Diagnosis Procedure  
31  
32  
33 Combination/Per-Diem Payment System, built by Medical Data Vision Co, Ltd (Tokyo,  
34  
35  
36 Japan)[4]. Briefly, this payment system is part of public health insurance reimbursement  
37  
38  
39 system in Japan[5], and therefore, the database consists of demographic/clinical  
40  
41  
42 information of all the hospitalisations for each hospital. The database included 272  
43  
44  
45 Japanese acute-care hospitals that consented to data utilisation (covering 12.4% of all  
46  
47  
48 admissions into acute-care hospitals in Japan in January 2019). We aggregated the  
49  
50  
51 weekly number of hospitalisations of children aged 1–17 years during the calendar  
52  
53  
54 weeks 1–21 of 2020 (January 1 to May 26) and the same periods in 2017–2019. We  
55  
56  
57 included only patients admitted for  $\leq 30$  days (accounting for 99% of the paediatric  
58  
59  
60

1  
2  
3  
4  
5  
6 hospitalisations in our dataset) because our dataset could not observe patients who were  
7  
8  
9 hospitalised for more than 30 days from week 21 of 2020.  
10

11  
12  
13  
14  
15 We described weekly trends in total paediatric hospitalisations and those with a primary  
16  
17  
18 diagnosis of one of nine selected conditions, based on the date of admission. We used  
19  
20  
21 nine common conditions (determined based on *International Classification of Diseases*  
22  
23  
24 *10* code), including food allergy, acute lower respiratory infections (ALRI) except  
25  
26  
27 COVID-19, Kawasaki disease (KD), intestinal infectious diseases (IID), febrile  
28  
29  
30 convulsions, asthma, appendicitis, inguinal hernia and trauma. We also examined  
31  
32  
33 hospitalisations with a primary diagnosis of COVID-19 to illustrate the epidemic in  
34  
35  
36 Japan.  
37

38  
39  
40  
41  
42 We employed a “difference-in-differences” model using Poisson regression to estimate  
43  
44  
45 the changes in the number of hospitalisations during the COVID-19 outbreak. It  
46  
47  
48 included a variable for each week, the year indicator (2017–2020), and an interaction  
49  
50  
51 variable between the outbreak status (week 9–21; the government requested nationwide  
52  
53  
54 cancellation of large-scale events and school closures in week 9 of 2020) and the year  
55  
56  
57 indicator for 2020.  
58  
59  
60

1  
2  
3  
4  
5  
6  
7  
8  
9 The weekly mean number of paediatric hospitalisations during weeks 9–21 decreased  
10 from 2,132 in 2017–2019 to 1,314 in 2020, a reduction of 38.4% (adjusted incidence  
11 rate ratios, 0.60; 95% confidence interval, 0.53–0.69) (**Figure 1** and **Table 1**). The  
12 weekly mean number of hospitalisations during weeks 9–21 decreased in 2020  
13 compared with 2017–2019 for food allergy (0.61; 0.52–0.70), for ALRI (0.39; 0.26–  
14 0.58), for KD (0.77; 0.67–0.89), for IID (0.22; 0.17–0.29), for febrile convulsions (0.69;  
15 0.57–0.84), for asthma (0.37; 0.29–0.47), for inguinal hernia (0.80; 0.67–0.95), and for  
16 trauma (0.68, 0.61–0.75). We found no evidence that the number of hospitalisations for  
17 appendicitis decreased (0.96; 0.82–1.12).  
18  
19  
20  
21  
22  
23  
24  
25  
26  
27  
28  
29  
30  
31  
32  
33  
34  
35  
36  
37  
38  
39

40 There were considerable decreases in paediatric hospitalisations across Japanese acute-  
41 care hospitals during the COVID-19 outbreak, especially concerning conditions related  
42 to communicable diseases and trauma, but not for appendicitis. Our findings may  
43 encourage policymakers to reallocate paediatric care resources during the pandemic.  
44  
45  
46  
47  
48  
49

50 There are several possible explanations for these reductions. First, non-pharmaceutical  
51 interventions (physical distancing and individual hygiene measures) probably reduced  
52 infections. School closures and stay-at-home requests presumably decreased accidents.  
53  
54  
55  
56  
57  
58  
59  
60

1  
2  
3  
4  
5  
6  
7 Second, deferred/cancelled treatments or examinations may explain the modest decrease  
8  
9 in inguinal hernia hospitalisations, especially in week 13 (corresponding to the spring  
10  
11 break) of 2020 compared with previous years.  
12  
13  
14  
15  
16  
17

18 Limitations of this study include the patient population, which did not cover all the  
19  
20 Japanese hospitals although our dataset covered 272 acute-care hospitals. Second, the  
21  
22 detailed mechanisms through which the paediatric hospitalisations decreased remain  
23  
24  
25  
26  
27 unknown.  
28  
29  
30  
31  
32  
33  
34  
35  
36  
37  
38  
39  
40  
41  
42  
43  
44  
45  
46  
47  
48  
49  
50  
51  
52  
53  
54  
55  
56  
57  
58  
59  
60



## References

- 1 Lazzerini M, Barbi E, Apicella A, *et al.* Delayed access or provision of care in Italy resulting from fear of COVID-19. *Lancet Child Adolesc Heal* 2020;**4**:e10–1. doi:10.1016/S2352-4642(20)30108-5
- 2 Pines JM, Zocchi MS, Black BS, *et al.* Characterizing pediatric emergency department visits during the COVID-19 pandemic. *Am J Emerg Med* Published Online First: 23 November 2020. doi:10.1016/j.ajem.2020.11.037
- 3 Williams TC, MacRae C, Swann O V, *et al.* Indirect effects of the COVID-19 pandemic on paediatric healthcare use and severe disease: a retrospective national cohort study. *Arch Dis Child* Published Online First: 15 January 2021. doi:10.1136/archdischild-2020-321008
- 4 Abe K, Miyawaki A, Nakamura M, *et al.* Trends in hospitalizations for asthma during the COVID-19 outbreak in Japan. *J Allergy Clin Immunol Pract* Published Online First: 14 October 2020. doi:10.1016/j.jaip.2020.09.060
- 5 Hayashida K, Murakami G, Matsuda S, *et al.* History and Profile of Diagnosis Procedure Combination (DPC): Development of a Real Data Collection System for Acute Inpatient Care in Japan. *J Epidemiol* 2021;**31**:1–11. doi:10.2188/jea.je20200288

1  
2  
3  
4  
5  
6 **Author contributions:** KS and AM had full access to the data in the study and takes  
7  
8  
9 responsibility for the accuracy and integrity of the data and its analyses.  
10

11  
12 Study concept and design: all authors.  
13

14  
15 Acquisition, analysis or interpretation of data: All authors.  
16

17  
18 Drafting of the manuscript: KS and AM.  
19

20  
21 Critical revision of the manuscript for important intellectual content: All authors.  
22

23  
24 Statistical analyses: KS and AM.  
25

26  
27 Administrative, technical or material support: all authors.  
28

29  
30 Study supervision: AM.  
31  
32  
33  
34  
35

36 **Funding:** This study was funded by JSPS KAKENHI Grants (grant number 20K18956  
37  
38 to AM). Medical Data Vision (Tokyo, Japan) provided the dataset used in this study in  
39  
40 the form of labor service. AM was supported by the Social Science Research Council  
41  
42  
43 Abe Fellowship.  
44  
45  
46  
47  
48  
49  
50

51 **Competing interests:** MN is one of the board of directors in Medical Data Vision and  
52  
53 received a personal salary from it outside of this study. HN supported Medical Data  
54  
55  
56  
57 Vision in algorithm construction and received personal fee outside this study.  
58  
59  
60

1  
2  
3  
4  
5  
6  
7  
8  
9 **Ethics approval:** Ethics Board of the University of Tokyo approved this study

10  
11  
12 (approval no: 2020105NI).  
13  
14  
15  
16  
17

18 **Patient and public involvement**

19  
20  
21 Patients and/or the public were not involved in the design, or conduct, or reporting, or  
22  
23  
24 dissemination plans of this research.  
25  
26  
27  
28  
29

30 **Data availability statement:** Data are available on reasonable request. Due to the  
31  
32  
33 contractual restrictions between the authors and the Medical Data Vision, the data are  
34  
35  
36 available on request.  
37  
38  
39  
40  
41  
42  
43  
44  
45  
46  
47  
48  
49  
50  
51  
52  
53  
54  
55  
56  
57  
58  
59  
60

1  
2  
3  
4  
5  
6  
7 **Figure 1. Trends in the number of hospitalisations of children across 272 acute-**  
8  
9 **care hospitals in Japan, overall and by condition during weeks 1–21 in 2017–2020.**  
10

11  
12  
13  
14  
15 Abbreviations: ALRI, acute lower respiratory infections; KD, Kawasaki disease; IID,  
16  
17 intestinal infectious diseases. We illustrated weekly paediatric hospitalisations, overall,  
18  
19 and for each common condition across the 272 acute-care hospitals in Japan (A-J). We  
20  
21 also showed trends in hospitalisations for COVID-19 among children (K) and all ages  
22  
23 (L), using *International Classification of Diseases 10* code U071 and B342. B342 was  
24  
25 used for reimbursement for COVID-19 hospitalisations before April 2020.  
26  
27  
28  
29  
30  
31  
32  
33  
34  
35  
36  
37  
38  
39  
40  
41  
42  
43  
44  
45  
46  
47  
48  
49  
50  
51  
52  
53  
54  
55  
56  
57  
58  
59  
60

**Table 1. Change in the number of paediatric hospitalisations during the COVID-19 outbreak in Japan**

| Condition‡                         | No. of hospitalisations per week* |                    | Difference between 2017-2019 vs. 2020 |          | Adjusted incidence rate ratio† |            |         |
|------------------------------------|-----------------------------------|--------------------|---------------------------------------|----------|--------------------------------|------------|---------|
|                                    | Weeks 9-21 of 2017-2019           | Weeks 9-21 of 2020 | Count                                 | % change | Estimate                       | 95% CI     | P value |
| Acute lower respiratory infections | 379                               | 145                | -235                                  | -61.9    | 0.39                           | 0.26, 0.58 | <0.001  |
| Intestinal infectious disease      | 209                               | 49                 | -160                                  | -76.5    | 0.22                           | 0.17, 0.29 | <0.001  |
| Trauma                             | 199                               | 136                | -63                                   | -31.9    | 0.68                           | 0.61, 0.75 | <0.001  |
| Asthma                             | 120                               | 36                 | -84                                   | -69.7    | 0.37                           | 0.29, 0.47 | <0.001  |
| Food allergy                       | 119                               | 103                | -16                                   | -13.1    | 0.61                           | 0.52, 0.70 | <0.001  |
| Kawasaki disease                   | 58                                | 42                 | -16                                   | -27.4    | 0.77                           | 0.67, 0.89 | <0.001  |
| Appendicitis                       | 49                                | 45                 | -4                                    | -8.9     | 0.96                           | 0.82, 1.12 | 0.59    |
| Febrile convulsions                | 42                                | 28                 | -14                                   | -33.2    | 0.69                           | 0.57, 0.84 | <0.001  |

|                 |      |      |      |       |      |               |        |
|-----------------|------|------|------|-------|------|---------------|--------|
| Inguinal hernia | 34   | 30   | -4   | -12.2 | 0.80 | 0.67,<br>0.95 | 0.01   |
| Total           | 2132 | 1314 | -818 | -38.4 | 0.60 | 0.53,<br>0.69 | <0.001 |

CI: confidence interval.

\* The numbers of hospitalisations were shown as a weekly mean over the corresponding weeks.

†A Poisson regression was applied to estimate adjusted incidence rate ratio with the weekly and the yearly trends adjusted. Huber-White standard errors were used for inference.  $P < 0.05$  was interpreted as statistically significant (Stata 16.1).

‡ *International Classification of Diseases 10* codes for the conditions were: A37, B012, B052, B59, B371, J9–J18 and J20–J22 (acute lower respiratory infections); A00–A09 (intestinal infectious diseases); S00–S99 and T00–T14 (trauma); J45 and J46 (asthma); T780 and T781 (food allergy); M303 (Kawasaki disease); K35–K37 (appendicitis); R560 (febrile convulsions); K40 (inguinal hernia).

1  
2  
3  
4  
5  
6  
7  
8  
9  
10  
11  
12  
13  
14  
15  
16  
17  
18  
19  
20  
21  
22  
23  
24  
25  
26  
27  
28  
29  
30  
31  
32  
33  
34  
35  
36  
37  
38  
39  
40  
41  
42  
43  
44  
45  
46  
47  
48  
49  
50  
51  
52  
53  
54  
55  
56  
57  
58  
59  
60

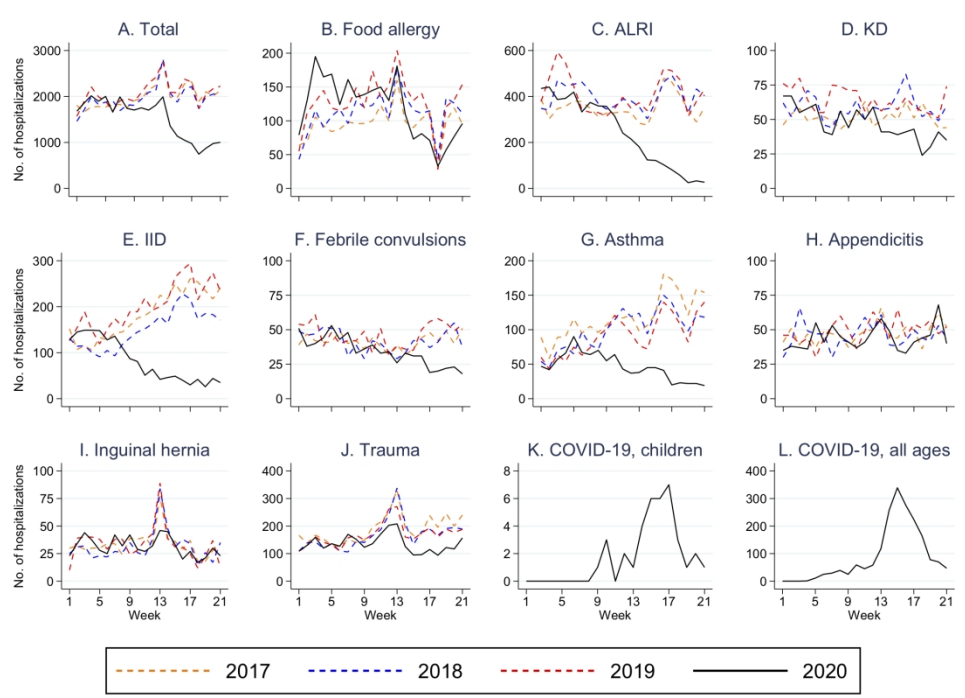

139x101mm (400 x 400 DPI)
